# Supplementary material for: Conserved and species-specific oxylipin pathways in the wound-activated chemical defense of the noninvasive red alga Gracilaria chilensis and the invasive Gracilaria vermiculophylla
Source: PubMed Central journal article supplement (PMC3302091; doi:10.3762/bjoc.8.30), 2012-02-21
Supplement: Beilstein_J_Org_Chem-08-283-s001.pdf [file Beilstein_J_Org_Chem-08-283-s001.pdf]

# Supporting information

for

## **Conserved and species-specific oxylipin pathways in the wound-activated chemical defense of the noninvasive red alga *Gracilaria chilensis* and the invasive *Gracilaria vermiculophylla***

**Martin Rempt<sup>1</sup>, Florian Weinberger<sup>2</sup>, Katharina Grosser<sup>1</sup>, Georg Pohnert<sup>\*1</sup>**

Address: <sup>1</sup>Institute for Inorganic and Analytical Chemistry, Lessingstr. 8, Friedrich-Schiller-University, D-07743 Jena, Germany, Tel: +493641948171; Fax +493641948172 and

<sup>2</sup>Leibniz-Institut für Meereswissenschaften, IFM-GEOMAR, Düsternbrooker Weg 20, D-24105 Kiel, Germany

Email: Georg Pohnert - Georg.Pohnert@uni-jena.de

\*Corresponding author

**Spectra for metabolites 5 and 6.**

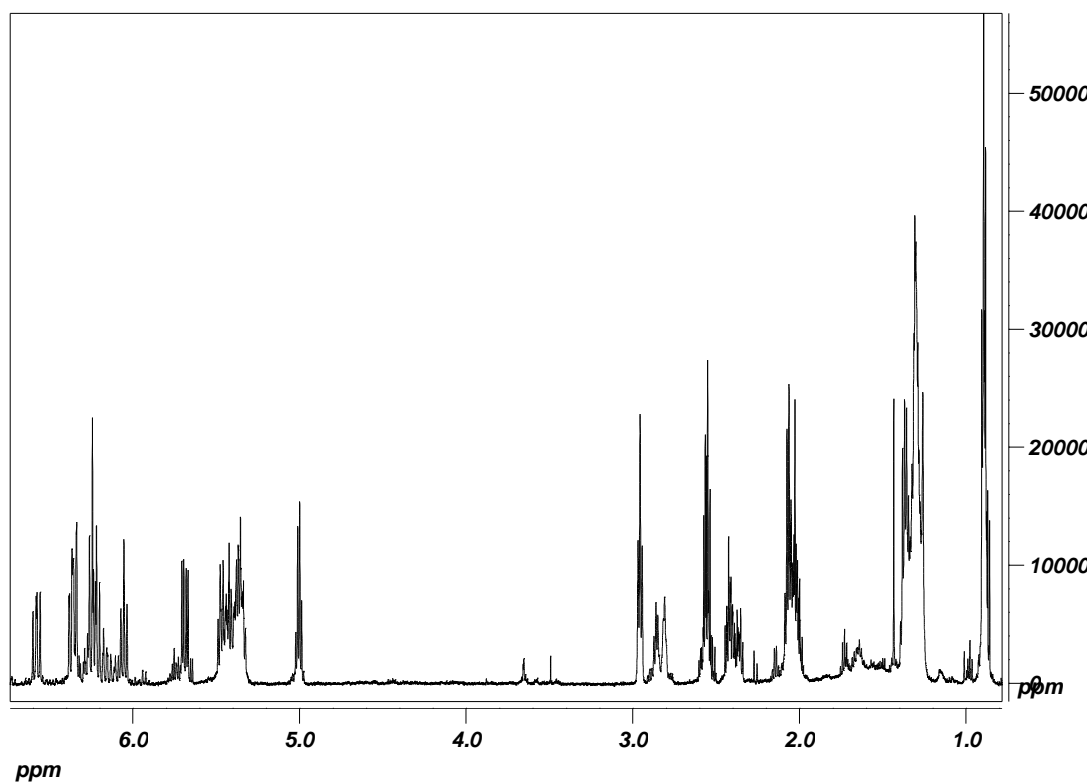

Figure S1:  $^1\text{H}$  NMR spectrum of compound 5.

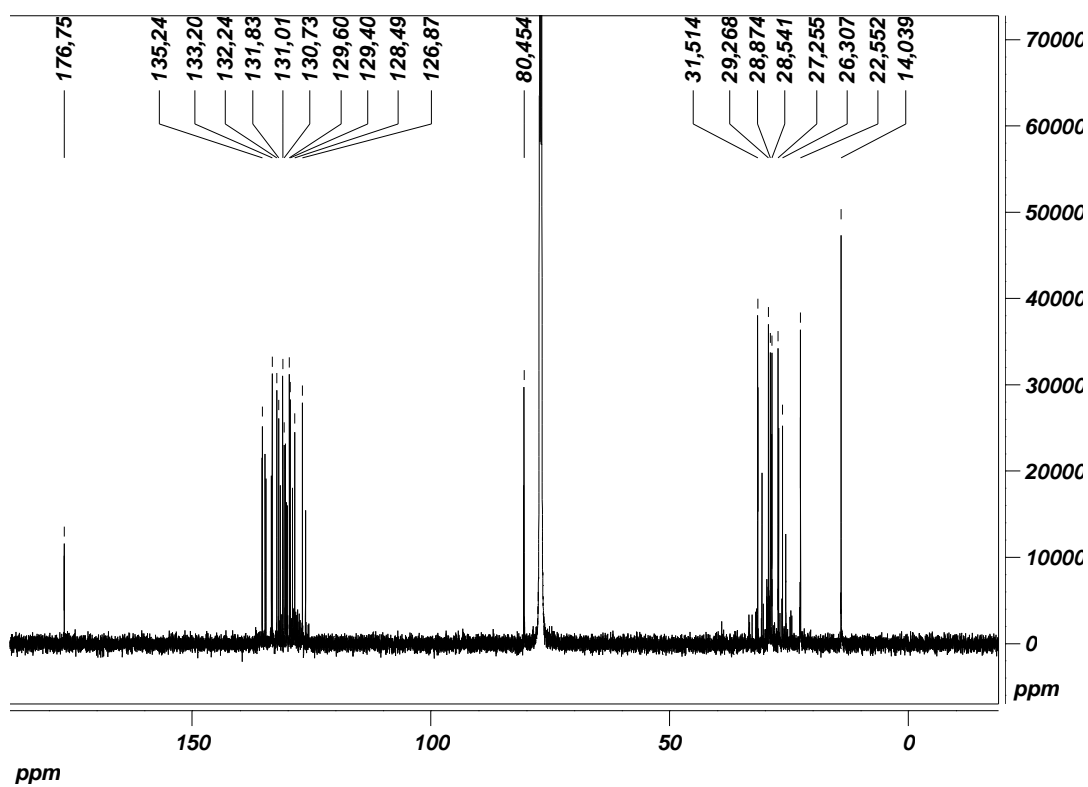

Figure S2:  $^{13}\text{C}$  NMR spectrum of compound 5.

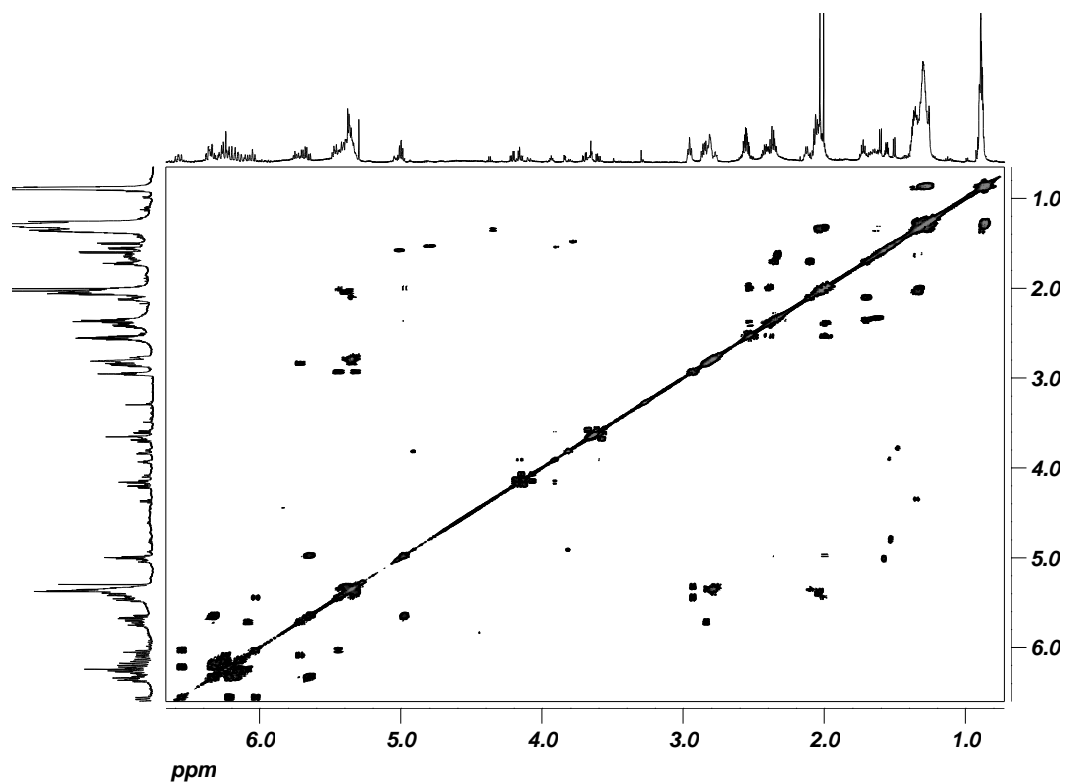

Figure S3:  $^1\text{H}/^1\text{H}$ -COSY spectrum of compound 5.

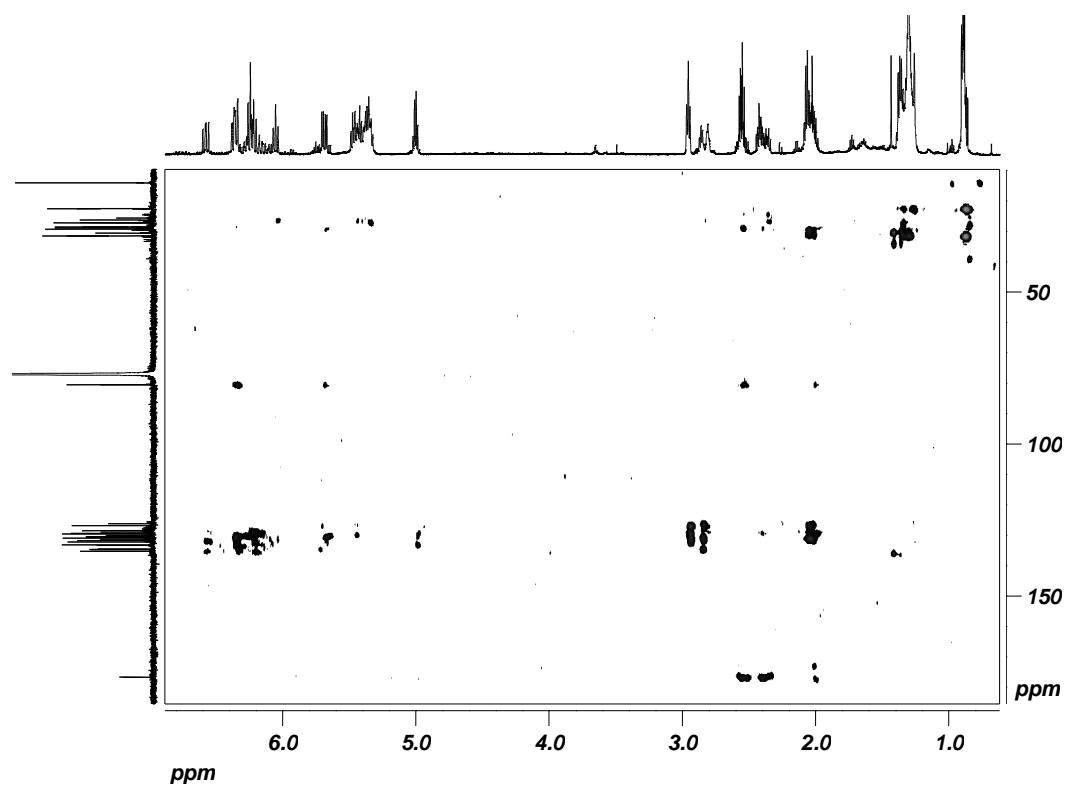

Figure S4: HMBC spectrum of compound 5.

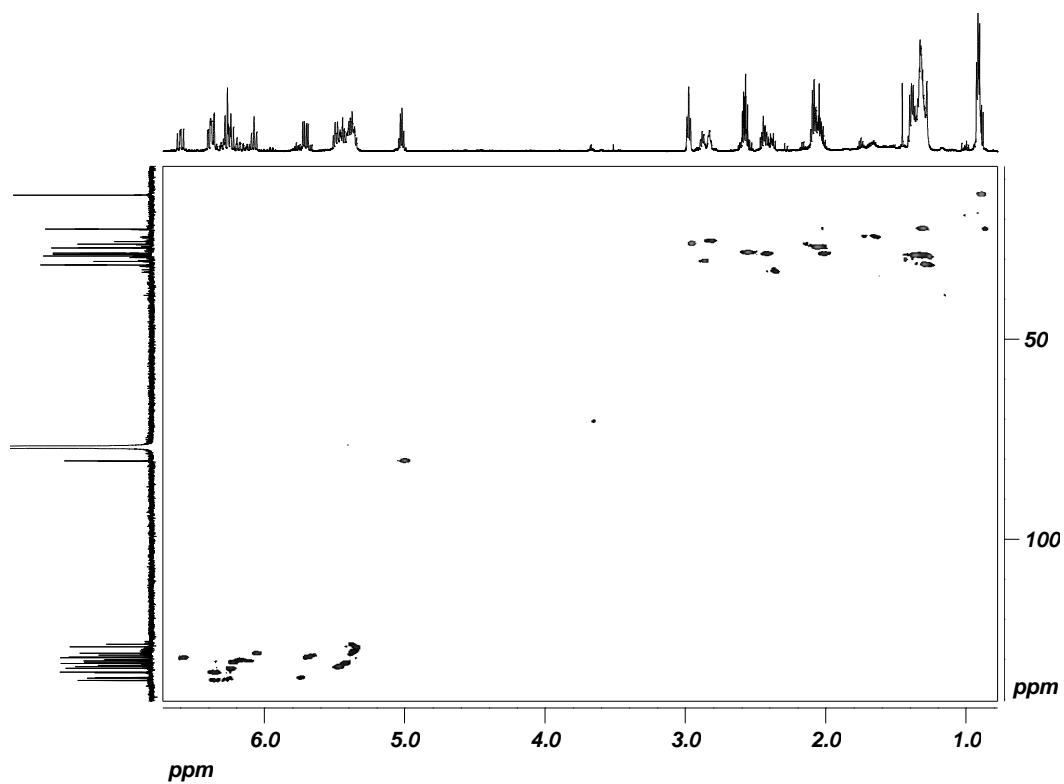

Figure S5: HSQC spectrum of compound 5.

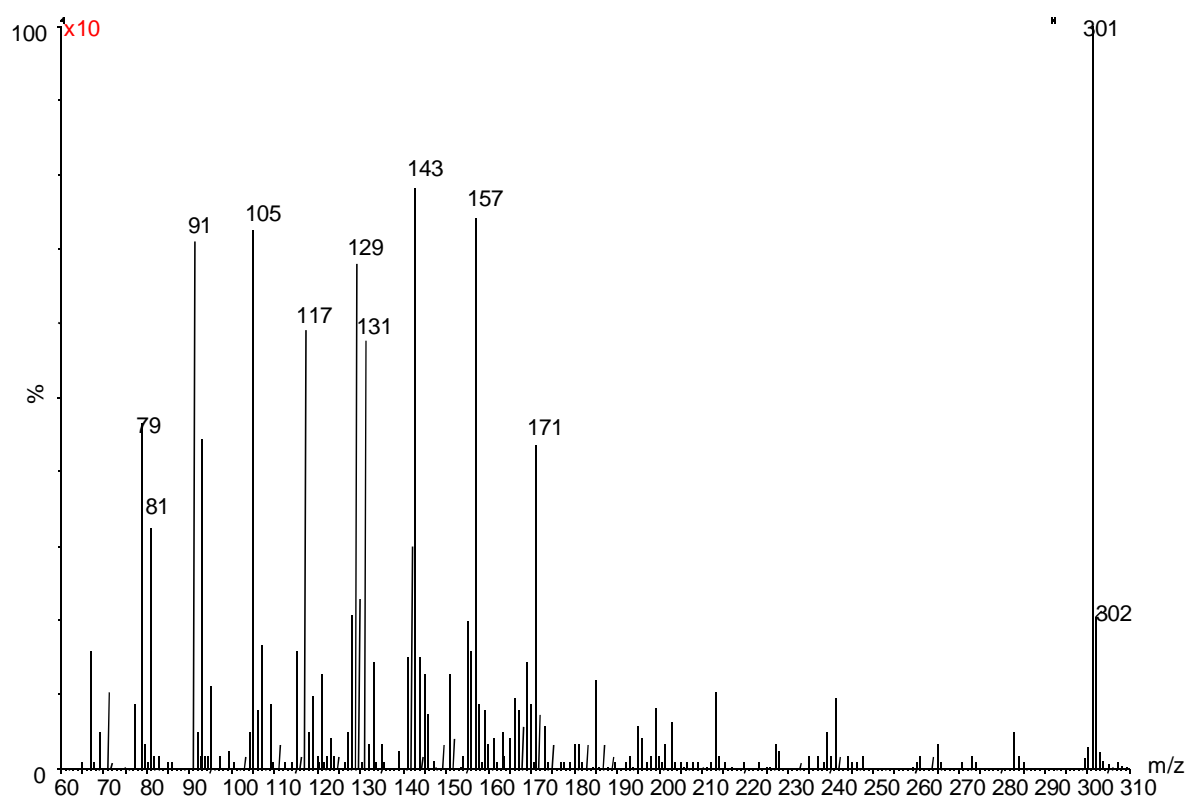

Figure S6: ESI-MS/MS spectrum of compound 5 (target mass 301 amu).

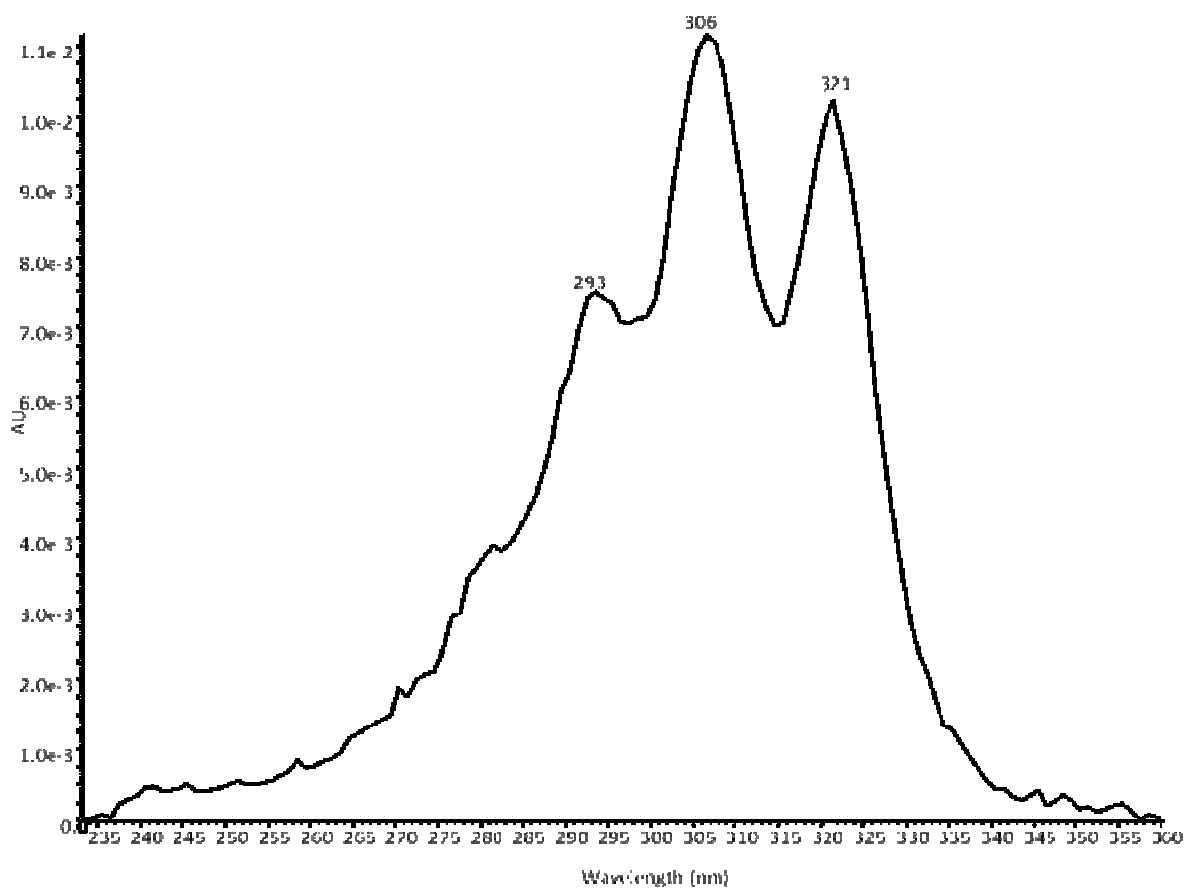

Figure S7: UV-vis spectrum of compound 5 in acetonitrile.

5-((1*E*,3*E*,5*E*,7*E*,10*Z*)-hexadeca-1,3,5,7,10-pentaenyl)dihydrofuran-2(3*H*)-one (**6**) was obtained as a light-yellow oil. The analysis of the *J*-couplings between H11 and H12 revealed the *trans* character of the double bond in comparison to compound **5**. Furthermore, a lambda (max) shift of about 2 nm in the UV-vis confirmed this assignment.

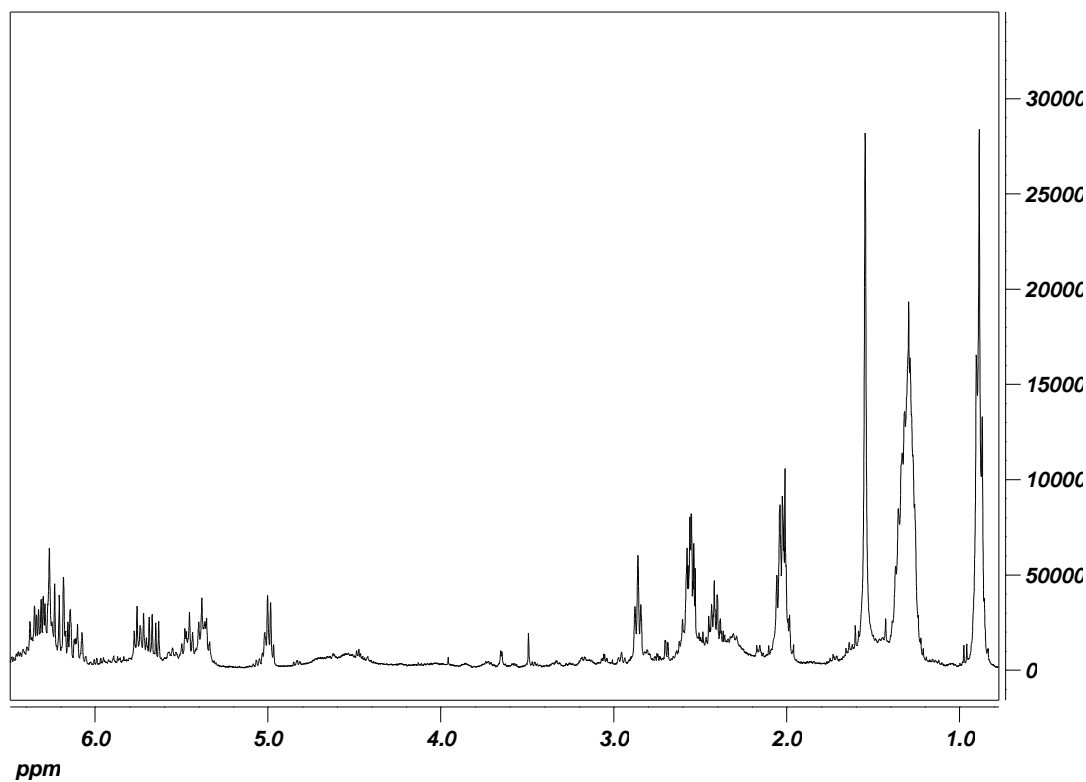

**Figure S8:**  $^1\text{H}$  NMR spectrum of compound **6**.

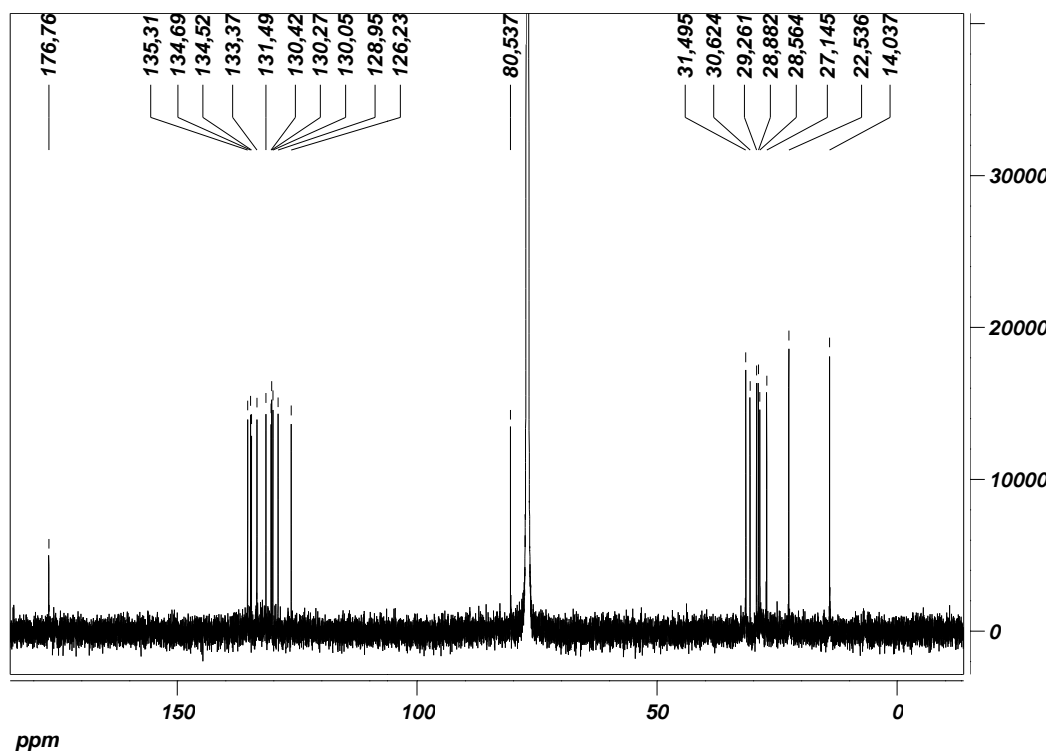

Figure S9:  $^{13}\text{C}$  NMR spectrum of compound 6.

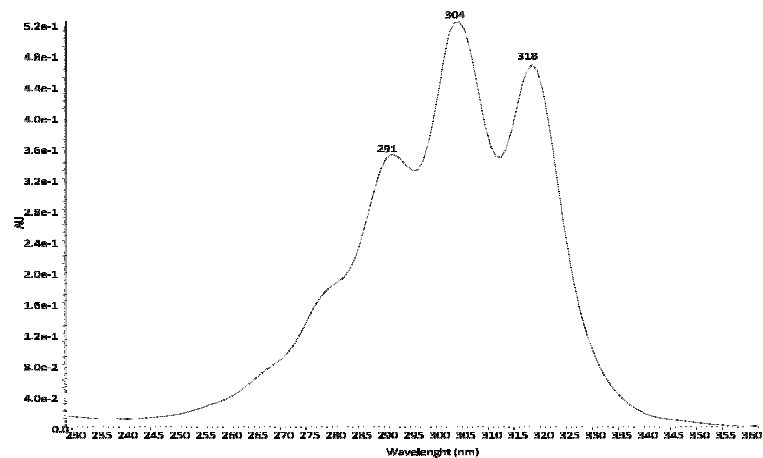

Figure S10: UV-vis spectrum of compound 6 in acetonitrile.
